# Supplementary material for: Ultra-fast 137Cs sequestration via a layered inorganic indium thioantimonate
Source: Royal Society of Chemistry journal article supplement (doi:10.1039/d2va00060a), 2022-01-01
Supplement: d2va00060a1.pdf [file d2va00060a1.pdf]

## Electronic Supplementary Information

### Ultra-fast $^{137}\text{Cs}$ sequestration via a layered inorganic indium thioantimonate

Xi Zeng,<sup>ab</sup> Min Zeng,<sup>c</sup> Ping-Wei Cai,<sup>ab</sup> Jun-Hao Tang,<sup>ab</sup> Wen Ma,<sup>ab</sup> Mei-Ling Feng<sup>\*ab</sup>  
and Xiao-Ying Huang<sup>ab</sup>

<sup>a</sup>State Key Laboratory of Structural Chemistry, Fujian Institute of Research on the Structure of Matter, Chinese Academy of Sciences, Fuzhou 350002, P. R. China

<sup>b</sup>University of Chinese Academy of Sciences, Beijing 100049, P. R. China.

<sup>c</sup>Hubei Key Laboratory of Ferro- & Piezoelectric Materials and Devices, Faculty of Physics and Electronic Science, Hubei University, Wuhan 430062, China

E-mail: fml@fjirsm.ac.cn

## 1. Adsorption equations

The adsorption capacity  $q_e$  (mg/g) at equilibrium, distribution coefficient  $K_d$  (mL/g) and removal rate  $R$  (%), desorption rate  $D$  (%), and leaching rate  $L$  (%) can be calculated based on equations (S1), (S2), (S3), (S4) and (S5), respectively:

$$q_e = \frac{V}{m}(C_0 - C_e) \quad (S1)$$

$$K_d = \frac{V(C_0 - C_e)}{m C_e} \quad (S2)$$

$$R = \frac{(C_0 - C_e)}{C_0} \times 100\% \quad (S3)$$

$$D = \frac{(C_{elution} \times V_{elution})}{(C_0 - C_e) \times V} \times 100\% \quad (S4)$$

$$L = \frac{C_A}{C_T} \times 100\% \quad (S5)$$

where  $C_0$  (mg/L) and  $C_e$  (mg/L) are concentrations of  $Cs^+$  (or other metal ions) at the initial state and equilibrium state, respectively.  $V$  (mL) is the  $Cs^+$  solution volume, and  $m$  (g) is the mass of KIAS.  $C_{elution}$  (mg/L) and  $V_{elution}$  (mL) are concentration and volume of eluent, respectively.  $C_A$  (mg/L) is the actual concentration of In in the solution after soaking the sample, and  $C_T$  (mg/L) is the theoretical concentration of In when the sample is completely dissolved in the solution.

Two classical models are commonly used in adsorption kinetic data, namely the pseudo-first-order and pseudo-two-order kinetic models. The integrated pseudo-first-order and pseudo-two-order models are expressed using equations (S6) and (S7), respectively.

$$\ln(q_e - q_t) = \ln q_e - k_1 t \quad (S6)$$

$$\frac{t}{q_t} = \frac{1}{k_2 q_e^2} - \frac{t}{q_e} \quad (S7)$$

where  $q_e$  (mg/g) and  $q_t$  (mg/g) are the amounts of  $Cs^+$  ions adsorbed at equilibrium state and at time  $t$ , respectively.  $t$  (min) is a adsorption time.  $k_1$  ( $\text{min}^{-1}$ ) and  $k_2$  ( $\text{g/mg min}^{-1}$ ) are respectively the rate constants of pseudo-first-order and pseudo-two-order. The

pseudo-two-order model has more complex reaction mechanism than the pseudo-first-order model, which assumes that the adsorption process involves both physical diffusion and chemiadsorption, and that chemiadsorption is the main rate-limiting step.<sup>1</sup>

The main common adsorption isotherm models in solution systems about the initial concentration of Cs<sup>+</sup> adsorbed are the Langmuir and the Freundlich models, which are used to obtain the maximum adsorption capacity ( $q_m$ ). The linear forms of the two models can be expressed by equations (S8) and (S9), respectively.

$$\frac{C_e}{q_e} = \frac{1}{q_m K_L} + \frac{C_e}{q_m} \quad (S8)$$

$$\ln q_e = \ln K_F + \frac{1}{n} \ln C_e \quad (S9)$$

where  $q_e$  (mg/g) and  $q_m$  (mg/g) are the equilibrium adsorption amount and maximum adsorption capacity, respectively.  $C_e$  (mg/L) is the equilibrium concentration of Cs<sup>+</sup> in solution.  $K_L$  (L/mg) is the Langmuir constant related to the free energy of adsorption.  $K_F$  [(mg/g)(L/mg)<sup>1/n</sup>] is the Freundlich constant related to the adsorbent capacity.  $n$  is the constant indicating the intensity of the adsorption process. The Langmuir model assumes that the adsorption on the solid surface is homogeneous, ideal monolayer adsorption; that all adsorption sites have equal capacity; that the interactions between adjacent sites are ignored; and that there are no mutual forces between adsorbed molecules.<sup>2</sup> The Freundlich model is commonly used to fit the adsorption process to the inhomogeneous surface of a solid. The model assumes that the energy distribution on the adsorbent surface is not homogeneous; that the adsorbent surface sites are occupied by adsorbate and that the energies are ordered from high to low during the adsorption process.<sup>3</sup>

The type of Langmuir model can be evaluated by separation factor ( $R_L$ ). The adsorption process may be irreversible for  $R_L = 0$ , favourable for  $0 < R_L < 1$ , linear for  $R_L = 1$ , or unfavourable for  $R_L > 1$ .<sup>4</sup> The definition is as follow:

$$R_L = \frac{1}{1 + K_L C_0} \quad (S10)$$

where  $C_0$  (mg/L) is the highest initial concentration of Cs<sup>+</sup>.

The theoretical adsorption capacity can be calculated based on equation (S11).

$$q(\textit{theoretical}) = \frac{2 \times \textit{atomic weight of Cs}}{\textit{Formula weight of KIAS}} \times 1000 \quad (\textit{S11})$$

## 2. Characterizations

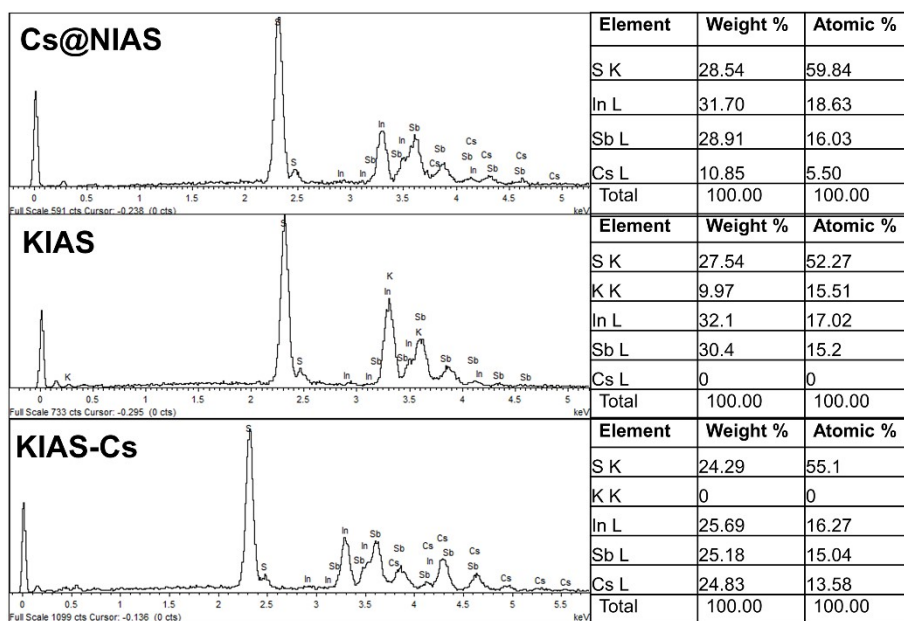

Fig. S1. EDS analysis results of Cs@NIAS, KIAS and KIAS-Cs.

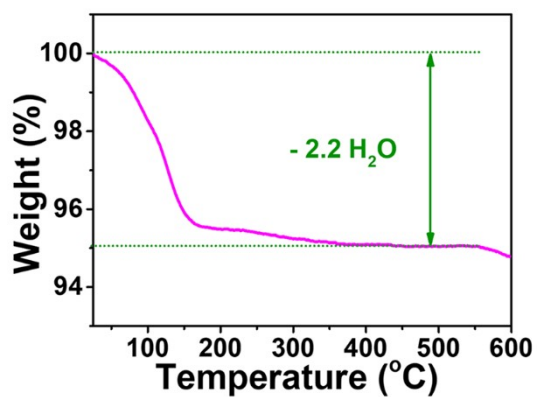

Fig. S2. TGA analysis results of KIAS.

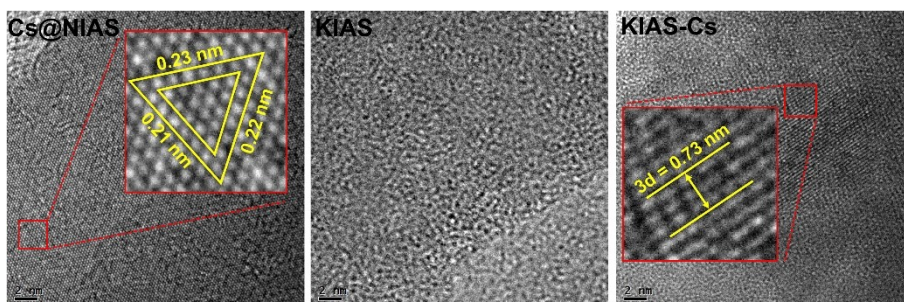

Fig. S3. High-resolution TEM images of Cs@NIAS, KIAS and KIAS-Cs.

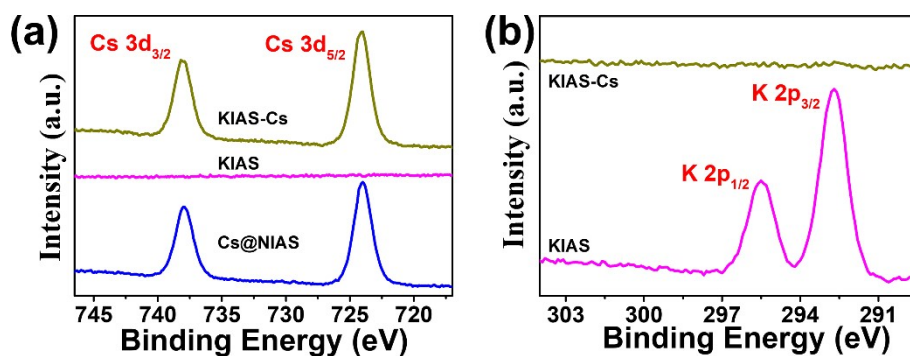

**Fig. S4.** XPS high-resolution (a) Cs 3d and (b) K 2p spectra of Cs@NIAS, KIAS and KIAS-Cs.

### 3. Radiolytic and hydrolytic stability

**Table S1.** Distribution coefficients and removal rates of Cs<sup>+</sup> ions captured by KIAS before and after  $\gamma$ -ray irradiation ( $V = 10$  mL,  $m = 10$  mg,  $V/m = 1000$  mL/g; 5 h contact time; at room temperature).

|                  | $C_0^{\text{Cs}}$ (mg/L) | $C_e^{\text{Cs}}$ (mg/L) | $q^{\text{Cs}}$ (mg/g) | $K_d^{\text{Cs}}$ (mL/g) | $R^{\text{Cs}}$ (%) |
|------------------|--------------------------|--------------------------|------------------------|--------------------------|---------------------|
| Pristine         | 7.75                     | 0.183                    | 7.568                  | $4.15 \times 10^4$       | 97.65               |
| 100 kGy $\gamma$ | 7.75                     | 0.448                    | 7.303                  | $1.63 \times 10^4$       | 94.23               |
| 200 kGy $\gamma$ | 7.75                     | 0.57                     | 7.18                   | $1.26 \times 10^4$       | 92.65               |
| Pristine         | 41.3                     | 1.345                    | 39.955                 | $2.97 \times 10^4$       | 96.74               |
| 100 kGy $\gamma$ | 41.3                     | 1.735                    | 39.565                 | $2.28 \times 10^4$       | 95.80               |
| 200 kGy $\gamma$ | 41.3                     | 1.9                      | 39.4                   | $2.07 \times 10^4$       | 95.40               |

**Table S2.** The pH-dependent Cs<sup>+</sup> ion-exchange results and In<sup>3+</sup> leaching rates of KIAS soaked in Cs<sup>+</sup>-solutions with different pH values ( $V = 10$  mL,  $m = 10$  mg,  $V/m = 1000$  mL/g; 5 h contact time; at room temperature).

| Initial<br>pH | $C_0^{Cs}$<br>(mg/L) | $C_e^{Cs}$<br>(mg/L) | $q^{Cs}$<br>(mg/g) | $K_d^{Cs}$<br>(mL/g) | $R^{Cs}$ (%) | $C^{In}$<br>(mg/L) | $L^{In}$ (%) |
|---------------|----------------------|----------------------|--------------------|----------------------|--------------|--------------------|--------------|
| 1.1           | 4.627                | 2.58                 | 2.047              | $7.93 \times 10^2$   | 44.23        | 0.0210             | 0.0075       |
| 2.2           | 6.7                  | 3.33                 | 3.37               | $1.01 \times 10^3$   | 50.30        | 0.0187             | 0.0066       |
| 3.2           | 4.437                | 0.286                | 4.151              | $1.45 \times 10^4$   | 93.55        | 0.0166             | 0.0059       |
| 4.0           | 4.456                | 0.345                | 4.111              | $1.19 \times 10^4$   | 92.26        | 0.0280             | 0.0099       |
| 5.4           | 4.256                | 0.212                | 4.044              | $1.91 \times 10^4$   | 95.02        | 0.0320             | 0.0114       |
| 6.2           | 4.304                | 0.181                | 4.123              | $2.28 \times 10^4$   | 95.81        | 0.0390             | 0.0138       |
| 7.2           | 4.437                | 0.188                | 4.248              | $2.26 \times 10^4$   | 95.76        | 0.0240             | 0.0085       |
| 8.1           | 4.38                 | 0.179                | 4.201              | $2.35 \times 10^4$   | 95.92        | 0.0122             | 0.0043       |
| 9.0           | 4.475                | 0.221                | 4.253              | $1.92 \times 10^4$   | 95.05        | 0.0116             | 0.0041       |
| 10.1          | 4.38                 | 0.199                | 4.181              | $2.11 \times 10^4$   | 95.47        | 0.0129             | 0.0046       |
| 11.1          | 4.418                | 0.318                | 4.099              | $1.29 \times 10^4$   | 92.80        | 0.0097             | 0.0034       |
| 12.0          | 4.076                | 1.82                 | 2.255              | $1.24 \times 10^3$   | 55.34        | 0.0179             | 0.0064       |
| 13.0          | 5.558                | 3.11                 | 2.448              | $7.87 \times 10^2$   | 44.04        | 0.0168             | 0.0060       |

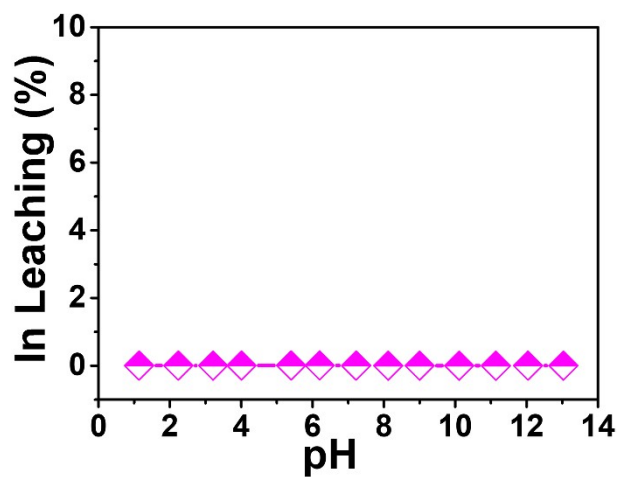

**Fig. S5.** The In<sup>3+</sup> leaching rates of KIAS soaked in Cs<sup>+</sup>-solutions with different pH values.

#### 4. Adsorption kinetics

**Table S3.** The adsorption kinetic results of NIAS ( $[(\text{CH}_3)_2\text{NH}_2]_2\text{In}_2\text{Sb}_2\text{S}_7$ ) towards  $\text{Cs}^+$  ( $V = 50$  mL,  $m = 50$  mg,  $V/m = 1000$  mL/g; at room temperature).

| Time (minutes) | $C_t^{\text{Cs}}$ (mg/L) | $q_t^{\text{Cs}}$ (mg/g) | $K_d^{\text{Cs}}$ (mL/g) | $R^{\text{Cs}}$ (%) |
|----------------|--------------------------|--------------------------|--------------------------|---------------------|
| 0              | 1.918                    | 0                        | 0                        | 0                   |
| 2              | 1.08                     | 0.838                    | 775.93                   | 43.69               |
| 5              | 1.08                     | 0.838                    | 775.93                   | 43.69               |
| 10             | 1.112                    | 0.806                    | 724.82                   | 42.02               |
| 20             | 1.208                    | 0.71                     | 587.75                   | 37.02               |
| 30             | 1.248                    | 0.67                     | 536.86                   | 34.93               |
| 60             | 1.314                    | 0.604                    | 459.67                   | 31.49               |
| 80             | 1.39                     | 0.528                    | 379.86                   | 27.53               |
| 120            | 1.432                    | 0.486                    | 339.39                   | 25.34               |
| 180            | 1.582                    | 0.336                    | 212.39                   | 17.52               |
| 360            | 1.616                    | 0.302                    | 186.88                   | 15.75               |
| 600            | 1.76                     | 0.158                    | 89.77                    | 8.24                |

**Table S4.** The adsorption kinetic results of KIAS towards  $\text{Cs}^+$  ( $V = 50$  mL,  $m = 50$  mg,  $V/m = 1000$  mL/g; at room temperature).

| Time (minutes) | $C_t^{\text{Cs}}$ (mg/L) | $q_t^{\text{Cs}}$ (mg/g) | $K_d^{\text{Cs}}$ (mL/g) | $R^{\text{Cs}}$ (%) |
|----------------|--------------------------|--------------------------|--------------------------|---------------------|
| 0              | 2.05                     | 0                        | 0                        | 0                   |
| 1              | 0.144                    | 1.906                    | $1.32 \times 10^4$       | 92.98               |
| 2              | 0.11                     | 1.94                     | $1.76 \times 10^4$       | 94.63               |
| 5              | 0.109                    | 1.941                    | $1.78 \times 10^4$       | 94.68               |
| 10             | 0.094                    | 1.956                    | $2.08 \times 10^4$       | 95.41               |
| 20             | 0.081                    | 1.969                    | $2.43 \times 10^4$       | 96.05               |
| 30             | 0.101                    | 1.949                    | $1.93 \times 10^4$       | 95.07               |
| 60             | 0.099                    | 1.951                    | $1.97 \times 10^4$       | 95.17               |
| 80             | 0.097                    | 1.953                    | $2.01 \times 10^4$       | 95.27               |
| 120            | 0.102                    | 1.948                    | $1.91 \times 10^4$       | 95.02               |
| 180            | 0.093                    | 1.957                    | $2.10 \times 10^4$       | 95.46               |
| 360            | 0.099                    | 1.951                    | $1.97 \times 10^4$       | 95.17               |
| 600            | 0.092                    | 1.958                    | $2.13 \times 10^4$       | 95.51               |



**Table S5.** Comparison of Cs<sup>+</sup> adsorption performance for KIAS and other adsorbents.

| Materials                                                                                                             | Temperature | Active pH range | kinetics/ $R^{Cs}$ | $q_m^{Cs}$ (mg/g) | Ref.      |
|-----------------------------------------------------------------------------------------------------------------------|-------------|-----------------|--------------------|-------------------|-----------|
| KIAS                                                                                                                  | RT          | 1.1–13.0        | 1 min/92.98%       | 309.60            | This work |
| FJSM-GAS-1                                                                                                            | RT          | NA              | NA                 | 164.23            | 5         |
| [CH <sub>3</sub> NH <sub>3</sub> ] <sub>20</sub> Ge <sub>10</sub> Sb <sub>28</sub> S <sub>72</sub> ·7H <sub>2</sub> O | 65 °C       | 2.8–11.0        | 2 min/59%          | 230.91            | 6         |
| KATS-2                                                                                                                | RT          | 1-12            | 5 min/99%          | 358               | 7         |
| FJSM-SnS                                                                                                              | 65 °C       | 0.7–11.0        | 5 min/73%          | 408.91            | 8         |
| FJSM-SnS-2                                                                                                            | RT          | 3.2–9.3         | < 60 min/83.56%    | 266.54            | 9         |
| FJSM-SnS-3                                                                                                            | RT          | 3.2–9.3         | < 60 min/73.36%    | 109.68            | 9         |
| FJSM-SbS                                                                                                              | 80 °C       | 3.4–11.4        | 2 min/86.90%       | 143.47            | 10        |
| KMS-1                                                                                                                 | RT          | 0.8–11.6        | 5 min/90%          | 226               | 11        |
| KMS-2                                                                                                                 | RT          | 3–10            | 10–15 h/NA         | 531.74            | 12        |
| KTS-3                                                                                                                 | RT          | 2–12            | 5 min/94%          | 280               | 13        |
| InSnOS                                                                                                                | RT          | 2–12            | 5 min/97%          | 537.71            | 14        |
| K@RWY                                                                                                                 | RT          | 1.6–11.8        | 5 min/97%          | 310               | 15        |
| K-MPS-1                                                                                                               | RT          | 2–12            | 15 min/78%         | 337.48            | 16        |
| KMS-1/r-GO                                                                                                            | RT          | 2–13            | > 4 h/69%          | 338.18            | 17        |
| KMS-1/PAN                                                                                                             | 25 °C       | 3–11            | 3 h/< 90%          | 69.75             | 18        |
| KTS-3/PAN                                                                                                             | 25 °C       | 2–12            | > 4 h/95%          | 133.6             | 19        |
| FJSM-InMOF                                                                                                            | ~25 °C      | NA              | > 3 h/91.73%       | 198.63            | 20        |
| MOF/KNiFC                                                                                                             | 25 °C       | 2–9             | 45 min             | 153               | 21        |
| K <sub>4</sub> Nb <sub>6</sub> O <sub>7</sub>                                                                         | RT          | 1–14            | 5 h/50%            | 166.13            | 22        |
| Na <sub>2</sub> V <sub>6</sub> O <sub>16</sub> ·3H <sub>2</sub> O                                                     | RT          | NA              | 10 min/94%         | 285.75            | 23        |
| NaFeTiO                                                                                                               | 25 °C       | 2.1–10.1        | 200 min/97.5       | 52.8              | 24        |
| Zeolite A                                                                                                             | 25 °C       | 2–8             | 90 min/90%         | 207.47            | 25        |
| NaMT1                                                                                                                 | 25 °C       | 3–11            | > 1 h/86.98%       | 290.70            | 26        |
| AMP-PAN                                                                                                               | 20 °C       | 2–10            | NA                 | 81.31             | 27        |

RT = room temperature; NA = Not available.

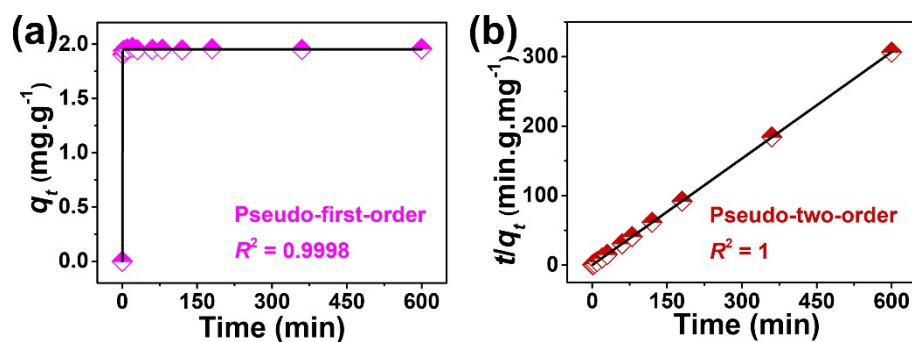

**Fig. S6.** Kinetics data fitted using (a) pseudo-first-order model and (b) pseudo-second-order model for KIAS.

## 5. Adsorption isotherms

**Table S6.** The adsorption isotherm results of KIAS towards Cs<sup>+</sup> ( $V = 10$  mL,  $m = 10$  mg,  $V/m = 1000$  mL/g; 5 h contact time; at room temperature).

| $C_0^{Cs}$ (mg/L) | $C_e^{Cs}$ (mg/L) | $q^{Cs}$ (mg/g) |
|-------------------|-------------------|-----------------|
| 76.75             | 9                 | 67.75           |
| 111.875           | 18.75             | 93.125          |
| 120               | 19.375            | 100.625         |
| 210.875           | 50.375            | 160.5           |
| 293.75            | 106.375           | 187.375         |
| 413.75            | 170.5             | 243.25          |
| 522.5             | 265               | 257.5           |
| 576.25            | 307.5             | 268.75          |
| 642.5             | 361.25            | 281.25          |
| 787.5             | 502.5             | 285             |

## 6. Effects of coexisting ions and dissolved organic matter

**Table S7.** The results for the Cs<sup>+</sup>-exchange of KIAS with individual competitive alkali or alkali-earth ions ( $V = 10$  mL,  $m = 10$  mg,  $V/m = 1000$  mL/g; 5 h contact time; at room temperature).

| Cation species              | $C_0^{\text{Cs}}$<br>(mg/L) | $C_e^{\text{Cs}}$ (mg/L) | $q^{\text{Cs}}$ (mg/g) | $K_d^{\text{Cs}}$ (mL/g) | $R^{\text{Cs}}$ (%) |
|-----------------------------|-----------------------------|--------------------------|------------------------|--------------------------|---------------------|
| 35.69 mg/L Na <sup>+</sup>  | 3.87                        | 0.273                    | 3.597                  | $1.32 \times 10^4$       | 92.95               |
| 41.49 mg/L K <sup>+</sup>   | 3.53                        | 0.28                     | 3.25                   | $1.16 \times 10^4$       | 92.07               |
| 43.1 mg/L Rb <sup>+</sup>   | 3.31                        | 0.198                    | 3.113                  | $1.58 \times 10^4$       | 94.03               |
| 38.14 mg/L Mg <sup>2+</sup> | 4.525                       | 0.393                    | 4.132                  | $1.05 \times 10^4$       | 91.31               |
| 38.51 mg/L Ca <sup>2+</sup> | 3.195                       | 0.305                    | 2.89                   | $9.48 \times 10^3$       | 90.45               |
| 48.54 mg/L Sr <sup>2+</sup> | 3.953                       | 0.975                    | 2.978                  | $3.05 \times 10^3$       | 75.33               |
| 24.44 mg/L Ba <sup>2+</sup> | 4.328                       | 0.36                     | 3.968                  | $1.10 \times 10^4$       | 91.68               |

**Table S8.** The results for the Cs<sup>+</sup>-exchange of KIAS with competitive excess Na<sup>+</sup> ions from NaCl ( $V = 10$  mL,  $m = 10$  mg,  $V/m = 1000$  mL/g; 5 h contact time; at room temperature).

| Initial Na/Cs<br>molar ratio | $C_0^{\text{Na}}$<br>(mg/L) | $C_0^{\text{Cs}}$<br>(mg/L) | $C_e^{\text{Cs}}$<br>(mg/L) | $q^{\text{Cs}}$ (mg/g) | $K_d^{\text{Cs}}$<br>(mL/g) | $R^{\text{Cs}}$ (%) |
|------------------------------|-----------------------------|-----------------------------|-----------------------------|------------------------|-----------------------------|---------------------|
| 12.43                        | 11.764                      | 5.47                        | 0.326                       | 5.144                  | $1.58 \times 10^4$          | 94.04               |
| 53.31                        | 35.69                       | 3.87                        | 0.273                       | 3.597                  | $1.32 \times 10^4$          | 92.95               |
| 300.78                       | 148.8                       | 2.86                        | 0.906                       | 1.954                  | $2.16 \times 10^3$          | 68.32               |
| 916.94                       | 467.9                       | 2.95                        | 1.883                       | 1.067                  | $5.67 \times 10^2$          | 36.17               |
| 16779.11                     | 11725.8                     | 4.04                        | 3.21                        | 0.83                   | $2.59 \times 10^2$          | 20.54               |

**Table S9.** The results for the Cs<sup>+</sup>-exchange of KIAS with competitive excess Sr<sup>2+</sup> ions from SrCl<sub>2</sub> ( $V = 10$  mL,  $m = 10$  mg,  $V/m = 1000$  mL/g; 5 h contact time; at room temperature).

| Initial Sr/Cs<br>molar ratio | $C_0^{\text{Sr}}$<br>(mg/L) | $C_0^{\text{Cs}}$<br>(mg/L) | $C_e^{\text{Cs}}$<br>(mg/L) | $q^{\text{Cs}}$ (mg/g) | $K_d^{\text{Cs}}$<br>(mL/g) | $R^{\text{Cs}}$ (%) |
|------------------------------|-----------------------------|-----------------------------|-----------------------------|------------------------|-----------------------------|---------------------|
| 0.66                         | 1.92                        | 4.443                       | 0.155                       | 4.288                  | $2.77 \times 10^4$          | 96.51               |
| 1.91                         | 5.15                        | 4.08                        | 0.478                       | 3.603                  | $7.54 \times 10^3$          | 88.30               |
| 18.63                        | 48.54                       | 3.953                       | 0.975                       | 2.978                  | $3.05 \times 10^3$          | 75.33               |
| 67.78                        | 194.6                       | 4.355                       | 3.093                       | 1.263                  | $4.08 \times 10^2$          | 28.99               |
| 190.95                       | 474.9                       | 3.773                       | 3.015                       | 0.758                  | $2.51 \times 10^2$          | 20.08               |

**Table S10.** The results for the Cs<sup>+</sup>-exchange of KIAS in the presence of interfering anions ( $V = 10$  mL,  $m = 10$  mg,  $V/m = 1000$  mL/g; 5 h contact time; at room temperature).

| Anion species                         | $C_0^{Cs}$<br>(mg/L) | $C_e^{Cs}$ (mg/L) | $q^{Cs}$ (mg/g) | $K_d^{Cs}$ (mL/g)    | $R^{Cs}$ (%) |
|---------------------------------------|----------------------|-------------------|-----------------|----------------------|--------------|
| 30 mg/L CO <sub>3</sub> <sup>2-</sup> | 5.006                | 0.451             | 4.555           | 1.01×10 <sup>4</sup> | 90.99        |
| 30 mg/L HCO <sub>3</sub> <sup>-</sup> | 5.464                | 0.231             | 5.234           | 2.27×10 <sup>4</sup> | 95.78        |
| 30 mg/L NO <sub>3</sub> <sup>-</sup>  | 5.127                | 0.414             | 4.713           | 1.14×10 <sup>4</sup> | 91.93        |
| 30 mg/L SO <sub>4</sub> <sup>2-</sup> | 5.104                | 0.299             | 4.805           | 1.61×10 <sup>4</sup> | 94.14        |

**Table S11.** The results for the Cs<sup>+</sup>-exchange of KIAS in the presence of interfering humic acid ( $V = 10$  mL,  $m = 10$  mg,  $V/m = 1000$  mL/g; 1–10 mg/L humic acid as dissolved organic matter; 5 h contact time; at room temperature).

| HA (mg/L) | $C_0^{Cs}$ (mg/L) | $C_e^{Cs}$ (mg/L) | $q^{Cs}$ (mg/g) | $K_d^{Cs}$ (mL/g)    | $R^{Cs}$ (%) |
|-----------|-------------------|-------------------|-----------------|----------------------|--------------|
| 0.5       | 4.414             | 0.092             | 4.323           | 4.72×10 <sup>4</sup> | 97.93        |
| 1         | 4.426             | 0.082             | 4.344           | 5.28×10 <sup>4</sup> | 98.14        |
| 2         | 4.700             | 0.089             | 4.611           | 5.18×10 <sup>4</sup> | 98.11        |
| 5         | 4.744             | 0.100             | 4.644           | 4.63×10 <sup>4</sup> | 97.89        |
| 10        | 4.696             | 0.096             | 4.601           | 4.80×10 <sup>4</sup> | 97.96        |

## 7. Cs<sup>+</sup> ions capture in actual water environments

**Table S12.** The results of Cs<sup>+</sup>-adsorption for KIAS in tap water and lake water ( $V = 10$  mL,  $m = 10$  mg,  $V/m = 1000$  mL/g; 5 h contact time; at room temperature).

| Experimental condition | Mixed ions       | $C_0$ (mg/L) | $C_e$ (mg/L) | $q$ (mg/g) | $K_d$ (mL/g)         | $R$ (%)  |
|------------------------|------------------|--------------|--------------|------------|----------------------|----------|
| Tap water              | Cs <sup>+</sup>  | 7.35         | 1.03         | 6.32       | 6.14×10 <sup>3</sup> | 85.99    |
|                        | Na <sup>+</sup>  | 19.649       | 17.681       | 1.968      | 111.31               | 10.02    |
|                        | K <sup>+</sup>   | 4.001        | 48.25        | -44.249    | -917.08              | -1105.95 |
|                        | Mg <sup>2+</sup> | 2.036        | 1.21         | 0.826      | 682.64               | 40.57    |
|                        | Ca <sup>2+</sup> | 14.498       | 8.054        | 6.444      | 800.10               | 44.45    |
| Lake water             | Cs <sup>+</sup>  | 5.8          | 0.73         | 5.07       | 6.95×10 <sup>3</sup> | 87.41    |
|                        | Na <sup>+</sup>  | 13.751       | 11.708       | 2.043      | 174.50               | 14.86    |
|                        | K <sup>+</sup>   | 3.624        | 41.27        | -37.646    | -912.19              | -1038.80 |
|                        | Mg <sup>2+</sup> | 1.743        | 0.989        | 0.754      | 762.39               | 43.26    |
|                        | Ca <sup>2+</sup> | 12.576       | 7.06         | 5.516      | 781.30               | 43.86    |

## 8. Desorption and regeneration

**Table S13.** The results of five consecutive adsorption-desorption recycling experiments for KIAS

( $V = 10$  mL,  $m = 10$  mg,  $V/m = 1000$  mL/g; 5 h contact time; at room temperature).

| Cycles | $C_0^{Cs}$<br>(mg/L) | $C_e^{Cs}$<br>(mg/L) | $q^{Cs}$<br>(mg/g) | $K_d^{Cs}$<br>(mL/g) | $R^{Cs}$<br>(%) | $C^{In}$<br>(mg/L) | $L^{In}$<br>(%) | $C_{elution}^{Cs}$<br>(mg/L) | $D^{Cs}$<br>(%) |
|--------|----------------------|----------------------|--------------------|----------------------|-----------------|--------------------|-----------------|------------------------------|-----------------|
| 1      | 7.152                | 0.566                | 6.586              | $1.16 \times 10^4$   | 92.09           | 0.0464             | 0.0165          | 6.242                        | 94.78           |
|        | 53.016               | 2.972                | 50.044             | $1.68 \times 10^4$   | 94.39           | 0.0439             | 0.0156          | 47.702                       | 95.32           |
| 2      | 7.152                | 0.624                | 6.528              | $1.05 \times 10^4$   | 91.28           | 0.0174             | 0.0062          | 6.364                        | 97.49           |
|        | 53.016               | 4.758                | 48.258             | $1.01 \times 10^4$   | 91.03           | 0.0066             | 0.0023          | 46.406                       | 96.16           |
| 3      | 7.152                | 0.546                | 6.606              | $1.21 \times 10^4$   | 92.37           | 0.0257             | 0.0091          | 6.362                        | 96.31           |
|        | 53.016               | 2.69                 | 50.326             | $1.87 \times 10^4$   | 94.93           | 0.0211             | 0.0075          | 48.522                       | 96.42           |
| 4      | 7.152                | 0.602                | 6.55               | $1.09 \times 10^4$   | 91.58           | 0.0181             | 0.0064          | 6.418                        | 97.98           |
|        | 53.016               | 3.226                | 49.79              | $1.54 \times 10^4$   | 93.92           | 0.0176             | 0.0062          | 46.54                        | 93.47           |
| 5      | 7.152                | 0.604                | 6.548              | $1.08 \times 10^4$   | 91.55           | 0.0093             | 0.0033          | 6.218                        | 94.96           |
|        | 53.016               | 3.978                | 49.038             | $1.23 \times 10^4$   | 92.50           | 0.0108             | 0.0038          | 47.468                       | 96.80           |

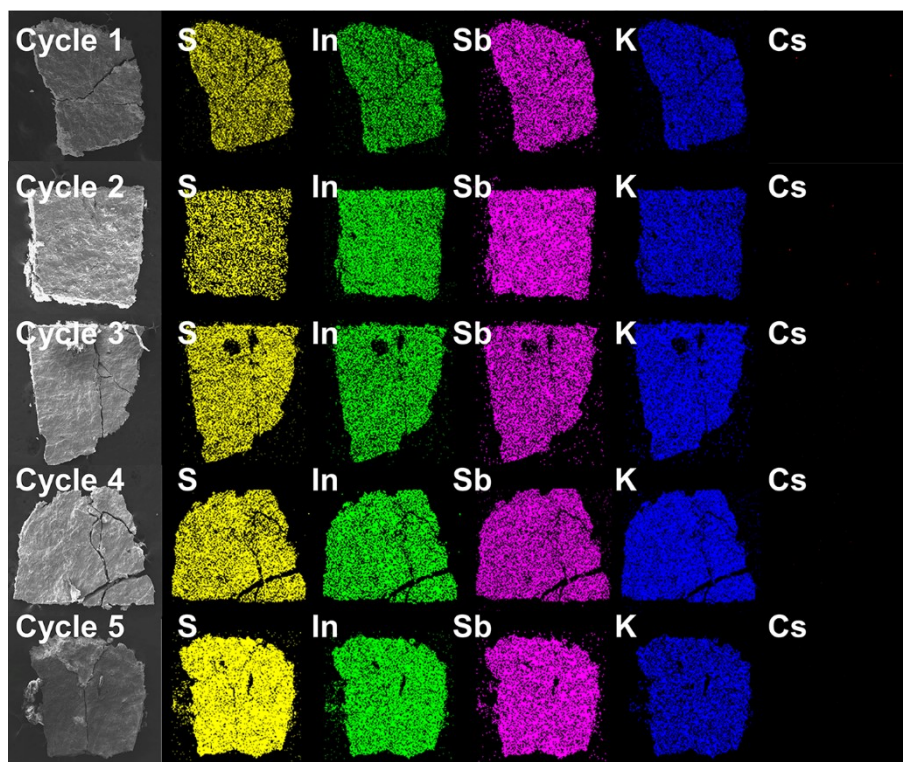

**Fig. S7.** Mapping analysis of the regenerated KIAS in each cycle ( $C_0^{Cs} = 53.016$  mg/L).

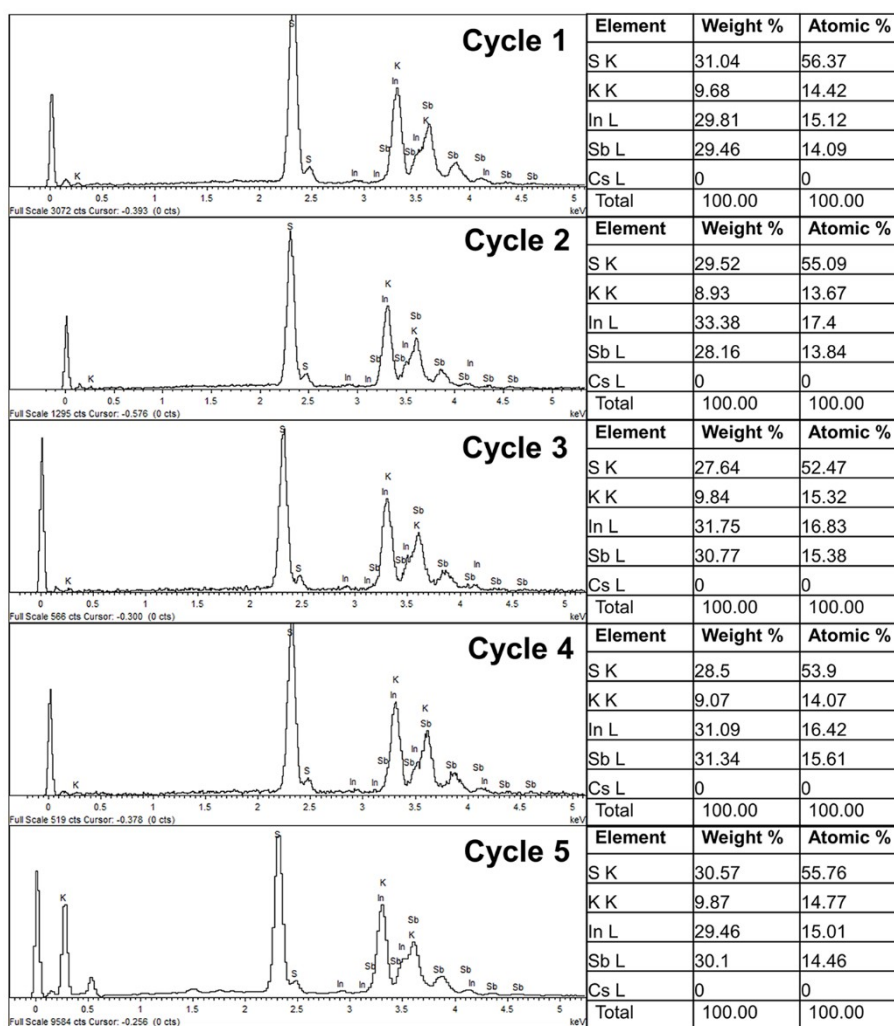

Fig. S8. EDS results of the regenerated KIAS in each cycle ( $C_0^{Cs} = 53.016$  mg/L).

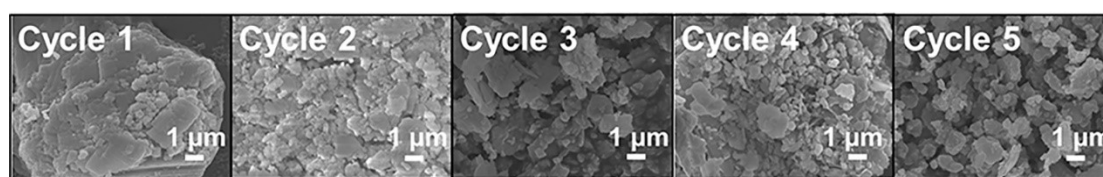

Fig. S9. SEM image of the regenerated KIAS in each cycle ( $C_0^{Cs} = 53.016$  mg/L).

## References

1. Y. S. Ho, G. McKay, Pseudo-second order model for sorption processes, *Process Biochem.*, 1999, **34**, 451-465.
2. I. Langmuir, The adsorption of gases on plane surfaces of glass, mica and platinum, *J. Am. Chem. Soc.*, 1918, **40**, 1361-1403.
3. H. Freundlich, Über die Adsorption in Lösungen, *Z. Phys. Chem.*, 1907, **57U**, 385-470.
4. H. Faghihian, M. Iravani, M. Moayed and M. Ghannadi-Maragheh, Preparation of a novel PAN-zeolite nanocomposite for removal of Cs<sup>+</sup> and Sr<sup>2+</sup> from aqueous solutions: Kinetic, equilibrium, and thermodynamic studies, *Chem. Eng. J.*, 2013, **222**, 41-48.
5. M. L. Feng, D. Sarma, Y. J. Gao, X. H. Qi, W. A. Li, X. Y. Huang and M. G. Kanatzidis, Efficient removal of [UO<sub>2</sub>]<sup>2+</sup>, Cs<sup>+</sup>, and Sr<sup>2+</sup> ions by radiation-resistant gallium thioantimonates, *J. Am. Chem. Soc.*, 2018, **140**, 11133-11140.
6. B. Zhang, M. L. Feng, H. H. Cui, C. F. Du, X. H. Qi, N. N. Shen, X. Y. Huang, Syntheses, crystal structures, ion-exchange, and photocatalytic properties of two amine-directed Ge-Sb-S compounds, *Inorg. Chem.*, 2015, **54**, 8474-8481.
7. C. Yang and K. Cho, Rapid and selective removal of Cs<sup>+</sup> from water by layered potassium antimony thioantimonate, *J. Hazard. Mater.*, 2021, **403**, 124105.
8. X. H. Qi, K. Z. Du, M. L. Feng, J. R. Li, C. F. Du, B. Zhang and X. Y. Huang, A two-dimensionally microporous thioantimonate with superior Cs<sup>+</sup> and Sr<sup>2+</sup> ion-exchange property, *J. Mater. Chem. A*, 2015, **3**, 5665-5673.
9. W. A. Li, J. R. Li, B. Zhang, H. Y. Sun, J. C. Jin, X. Y. Huang, M. L. Feng, Layered thioantimonates with distinct arrangements of mixed cations for the selective capture of Cs<sup>+</sup>, Sr<sup>2+</sup>, and Eu<sup>3+</sup> ions, *ACS Appl. Mater. Interfaces*, 2021, **13**, 10191-10201.
10. Y. Y. Liao, J. R. Li, B. Zhang, H. Y. Sun, W. Ma, J. C. Jin, M. L. Feng, X. Y. Huang, Robust and flexible thioantimonate materials for Cs<sup>+</sup> remediation with distinctive structural transformation: A clear insight into the ion-exchange mechanism, *ACS Appl. Mater. Interfaces*, 2021, **13**, 5275-5283.

11. M. J. Manos and M. G. Kanatzidis, Highly efficient and rapid Cs<sup>+</sup> uptake by the layered metal sulfide K<sub>2x</sub>Mn<sub>x</sub>Sn<sub>3-x</sub>S<sub>6</sub> (KMS-1), *J. Am. Chem. Soc.*, 2009, **131**, 6599-6607.
12. J. L. Mertz, Z. H. Fard, C. D. Malliakas, M. J. Manos and M. G. Kanatzidis, Selective removal of Cs<sup>+</sup>, Sr<sup>2+</sup>, and Ni<sup>2+</sup> by K<sub>2x</sub>Mg<sub>x</sub>Sn<sub>3-x</sub>S<sub>6</sub> (x = 0.5-1) (KMS-2) relevant to nuclear waste remediation, *Chem. Mater.*, 2013, **25**, 2116-2127.
13. D. Sarma, C. D. Malliakas, K. S. Subrahmanyam, S. M. Islama and M. G. Kanatzidis, K<sub>2x</sub>Mg<sub>x</sub>Sn<sub>3-x</sub>S<sub>6</sub> (x = 0.65-1): A new metal sulfide for rapid and selective removal of Cs<sup>+</sup>, Sr<sup>2+</sup> and UO<sub>2</sub><sup>2+</sup> ions, *Chem. Sci.*, 2016, **7**, 1121-1132.
14. L. Wang, H. Pei, D. Sarma, X. M. Zhang, K. MacRenaris, C. D. Malliakas, M. G. Kanatzidis, Highly selective radioactive <sup>137</sup>Cs<sup>+</sup> capture in an open-framework oxysulfide based on supertetrahedral cluster, *Chem. Mater.*, 2019, **31**, 1628-1634.
15. H. Yang, M. Luo, L. Luo, H. Wang, D. Hu, J. Lin, X. Wang, Y. Wang, S. Wang, X. Bu, P. Feng and T. Wu, Highly selective and rapid uptake of radionuclide cesium based on robust zeolitic chalcogenide via stepwise ion-exchange strategy, *Chem. Mater.*, 2016, **28**, 8774-8780.
16. E. Rathore, P. Pal and K. Biswas, Reversible and efficient sequestration of cesium from water by the layered metal thiophosphate K<sub>0.48</sub>Mn<sub>0.76</sub>PS<sub>3</sub>·H<sub>2</sub>O, *Chem. Eur. J.*, 2017, **23**, 11085-11092.
17. K. Gupta, B. L. Yuan, C. Chen, N. Varnakavi, M. L. Fu, K<sub>2x</sub>Mn<sub>x</sub>Sn<sub>3-x</sub>S<sub>6</sub> (x=0.5-0.95) (KMS-1) immobilized on the reduced graphene oxide as KMS-1/r-GO aerogel to effectively remove Cs<sup>+</sup> and Sr<sup>2+</sup> from aqueous solution, *Chem. Eng. J.*, 2019, **369**, 803-812.
18. Y. X. Wang, J. R. Li, J.-C. E. Yang, B. L. Yuan, M. L. Fu, Granulose KMS-1/PAN composite for Cs<sup>+</sup> removal, *RSC Adv.*, 2015, **5**, 91431-91435.
19. H. H. Eom, Y. Kim, D. Harbottle, J. W. Lee, Immobilization of KTS-3 on an electrospun fiber membrane for efficient removal of Cs<sup>+</sup> and Sr<sup>2+</sup>, *J. Environ. Chem. Eng.*, 2021, **9**, 105991.
20. Y. J. Gao, M. L. Feng, B. Zhang, Z. F. Wu, Y. Song and X. Y. Huang, An easily



synthesized microporous framework material for the selective capture of radioactive Cs<sup>+</sup> and Sr<sup>2+</sup> ions, *J. Mater. Chem. A*, 2018, **6**, 3967-3976.

21. S. Naeimi, H. Faghihian, Performance of novel adsorbent prepared by magnetic metal-organic framework (MOF) modified by potassium nickel hexacyanoferrate for removal of Cs<sup>+</sup> from aqueous solution, *Sep. Purif. Technol.*, 2017, **175**, 255-265.

22. J. Sun, D. Yang, C. Sun, L. Liu, S. Yang, Y. Jia, R. Cai and X. Yao, Potassium niobate nanolamina: A promising adsorbent for entrapment of radioactive cations from water, *Sci. Rep.*, 2014, **4**, 07313.

23. S. Sarina, A. Bo, D. Liu, H. Liu, D. Yang, C. Zhou, N. Maes, S. Komarneni, H. Zhu, Separate or simultaneous removal of radioactive cations and anions from water by layered sodium vanadate-based sorbents, *Chem. Mater.*, 2014, **26**, 4788-4795.

24. P. Amesh, A. S. Suneesh, K. A. Venkatesan, R. U. Maheswari and S. Vijayalakshmi, Preparation and ion exchange studies of cesium and strontium on sodium iron titanate, *Sep. Purif. Technol.*, 2020, **238**, 116393.

25. A. M. El-Kamash, Evaluation of zeolite A for the sorptive removal of Cs<sup>+</sup> and Sr<sup>2+</sup> ions from aqueous solutions using batch and fixed bed column operations, *J. Hazard. Mater.*, 2008, **151**, 432-445.

26. Y. Kim, Y. K. Kim, J. H. Kim, M.-S. Yim, D. Harbottle, J. W. Lee, Synthesis of functionalized porous montmorillonite via solid-state NaOH treatment for efficient removal of cesium and strontium ions, *Appl. Surf. Sci.*, 2018, **450**, 404-412.

27. Y. Park, Y. C. Lee, W. S. Shin and S. J. Choi, Removal of cobalt, strontium and cesium from radioactive laundry wastewater by ammonium molybdophosphate-polyacrylonitrile (AMP-PAN), *Chem. Eng. J.*, 2010, **162**, 685-695.
